# Supplementary material
Source: PubMed Central journal article supplement (PMC2151811)
Supplement: bjpg57-793TableS1.pdf [file bjpg57-793TableS1.pdf]

**Supplementary Table 1. Guidelines for physical therapy used in the study.**

| Progression         | Low (level I)                                                                                                                                                                                    | →                                                                                                                       |                                                                               |                                                                                                                                                                              |                                                                                                            | High (level VI)    |
|---------------------|--------------------------------------------------------------------------------------------------------------------------------------------------------------------------------------------------|-------------------------------------------------------------------------------------------------------------------------|-------------------------------------------------------------------------------|------------------------------------------------------------------------------------------------------------------------------------------------------------------------------|------------------------------------------------------------------------------------------------------------|--------------------|
| Stability           | Isolated isometric exercises.                                                                                                                                                                    | Standing broad → small base.                                                                                            | Standing on two legs on an unstable base with distraction.                    | One leg standing on a stable base with distraction.                                                                                                                          | One leg standing on an unstable base with distraction.                                                     |                    |
|                     | Standing on two legs: with → without support of the hands.                                                                                                                                       | Standing on two legs on an unstable base.                                                                               | One leg standing on a stable base.                                            | One leg standing on an unstable base.                                                                                                                                        | Walking and exercises on a small and/or unstable base.                                                     |                    |
| Walking/<br>running | Walking with → without crutches.                                                                                                                                                                 | Walking with changes in direction.<br>Broad → small base<br>(e.g. walking on toes or heels, walking as on a tightrope). | Jogging in a straight line                                                    | Jogging with changes in direction.<br>Jogging → running in a straight line.                                                                                                  | Running with sudden changes in direction and speed                                                         | Sport              |
|                     | Jumping                                                                                                                                                                                          | Jumping on the place: with → without support of the hands; stable → unstable base.                                      | Forward and backward jumping with two legs together (stable → unstable base). | Sideward jumping with two legs together (stable → unstable base).<br>Forward jumping with two legs together and progression in height and distance (stable → unstable base). | Forward jumps from one leg to the other (stable → unstable base).<br>Skate jumps (stable → unstable base). | Jumping on one leg |
| Additional          | Barefooted (proprioceptive development)<br>Daily use of tape on the lateral side of the injured lower leg<br>Daily home exercises during a minimum of 6 weeks also<br>Training the uninjured leg |                                                                                                                         |                                                                               |                                                                                                                                                                              |                                                                                                            |                    |

van Rijn RM, van Os AG, Kleinrensink G-J, *et al.* Supervised exercises for adults with acute lateral ankle sprain: a randomised controlled trial. *Br J Gen Pract* 2007; **57**(543): 793–800. ©British Journal of General Practice
